# Supplementary material
Source: PubMed Central journal article supplement (PMC3414566)
Supplement: SD2.pdf [file SD2.pdf]

SUPPLEMENTAL TABLE

Total number of viable and non-viable cysts per pig at necropsy by affected organ and percentage of evagination in cysts from muscles

| Pig no. | Group no. | Group | Pig-W     | Cyst count by tissue |      |      |       |     |        |     |       |     |     | Evagination in cysts from muscle |
|---------|-----------|-------|-----------|----------------------|------|------|-------|-----|--------|-----|-------|-----|-----|----------------------------------|
|         |           |       |           | Muscle               |      |      | Heart |     | Tongue |     | Brain |     |     |                                  |
|         |           |       |           | W-Msc                | V    | NV   | V     | NV  | V      | NV  | V     | NV  |     |                                  |
| 2       | *+        | 1     | AbPd      | 35                   | 398  | 0    | 889   | 0   | 313    | 0   | 220   | 9   | 0   | 0% (0/38)                        |
| 7       |           | 1     | AbPd      | 62                   | 1225 | 0    | 1010  | 0   | 24     | 0   | 172   | 8   | 4   | 0% (0/34)                        |
| 9       |           | 1     | AbPd      | 70                   | 1672 | 0    | 118   | 0   | 5      | 0   | 23    | 0   | 10  | 2.9% (1/34)                      |
| 11      |           | 1     | AbPd      | 52                   | 1378 | 0    | 259   | 0   | 22     | 0   | 30    | 0   | 8   | 6.1% (2/33)                      |
| 13      |           | 1     | AbPd      | 65                   | 2048 | 0    | 38    | 0   | 10     | 0   | 4     | 0   | 2   | 0% (0/32)                        |
| 18      |           | 1     | AbPd      | 51                   | 1171 | 0    | 363   | 0   | 7      | 0   | 14    | 4   | 9   | 0% (0/32)                        |
| 5       |           | 2     | Pz        | 36                   | 1044 | 194  | 6     | 1   | 18     | 5   | 8     | 6   | 1   | 84.2% (32/38)                    |
| 8       |           | 2     | Pz        | 48                   | 913  | 607  | 21    | 36  | 34     | 66  | 2     | 82  | 0   | 88.6% (39/44)                    |
| 10      |           | 2     | Pz        | 49                   | 1203 | 222  | 51    | 35  | 14     | 54  | 18    | 27  | 0   | 30.3% (10/33)                    |
| 14      |           | 2     | Pz        | 30                   | 1351 | 2093 | 5     | 174 | 2      | 272 | 2     | 236 | 0   | 84.2% (32/38)                    |
| 17      |           | 2     | Pz        | 73                   | 1680 | 465  | 27    | 61  | 15     | 99  | 7     | 64  | 0   | 63.6% (21/33)                    |
| 19      |           | 2     | Pz        | 66                   | 1424 | 689  | 80    | 102 | 26     | 53  | 10    | 5   | 1   | 38.2% (13/34)                    |
| 1       | *+        | 3     | AbPzPd    | 42                   | 306  | 0    | 125   | 0   | 30     | 0   | 52    | 0   | 145 | 14.6% (6/41)                     |
| 4       | *+        | 3     | AbPzPd    | 32                   | 120  | 0    | 1267  | 0   | 183    | 0   | 716   | *   | *   | (¥)                              |
| 6       |           | 3     | AbPzPd    | 78                   | 1441 | 0    | 83    | 0   | 45     | 0   | 23    | 0   | 40  | 31.3% (10/32)                    |
| 12      |           | 3     | AbPzPd    | 40                   | 1595 | 0    | 341   | 0   | 60     | 0   | 80    | 0   | 8   | 0% (0/33)                        |
| 15      |           | 3     | AbPzPd    | 70                   | 1843 | 1    | 3     | 0   | 5      | 0   | 2     | 0   | 1   | 20% (2/10)                       |
| 16      |           | 3     | AbPzPd    | 42                   | 1263 | 0    | 312   | 0   | 0      | 0   | 18    | 0   | 93  | 0% (0/35)                        |
| 43      |           | 4     | Oxf       | 147                  | 2402 | 0    | 355   | 0   | 0      | 0   | 7     | 0   | 14  | 0% (0/33)                        |
| 44      |           | 4     | Oxf       | 141                  | 2338 | 0    | 470   | 0   | 25     | 0   | 85    | 1   | 3   | 0% (0/33)                        |
| 45      | *+        | 4     | Oxf       | 17                   | 385  | 0    | 500   | 0   | 103    | 0   | 48    | ¥   | ¥   | (£)                              |
| 50      |           | 4     | Oxf       | 66                   | 1349 | 0    | 1958  | 0   | 13     | 0   | 230   | 10  | 23  | 0% (0/33)                        |
| 51      |           | 4     | Oxf       | 85                   | 1343 | 0    | 930   | 0   | 111    | 0   | 96    | 17  | 43  | 3% (1/33)                        |
| 54      |           | 4     | Oxf       | 35                   | 845  | 4    | 2636  | 0   | 21     | 0   | 155   | 13  | 36  | 0% (0/33)                        |
| 32      |           | 5     | Ntz       | 200                  | 2352 | 599  | 1     | 51  | 2      | 44  | 0     | 20  | 2   | 58.4% (18/33)                    |
| 34      |           | 5     | Ntz       | 45                   | 1127 | 905  | 1     | 1   | 0      | 61  | 0     | 8   | 0   | 58.4% (18/33)                    |
| 36      |           | 5     | Ntz       | 45                   | 1401 | 1224 | 18    | 17  | 69     | 162 | 197   | 54  | 0   | 92.3% (60/65)                    |
| 39      |           | 5     | Ntz       | 40                   | 1083 | 809  | 17    | 199 | 1      | 198 | 0     | 114 | 0   | 0% (0/34)                        |
| 40      |           | 5     | Ntz       | 53                   | 1722 | 4505 | 1     | 510 | 2      | 348 | 2     | 15  | 0   | 97% (32/33)                      |
| 42      |           | 5     | Ntz       | 37                   | 1149 | 1    | 0     | 0   | 0      | 0   | 0     | 0   | 0   | 60% (3/5)                        |
| 3       | *+        | 6     | Pd        | 60                   | 1244 | 149  | 25    | 14  | 50     | 8   | 9     | ¥   | ¥   | 75.8% (50/66)                    |
| 33      |           | 6     | Pd        | 175                  | 2743 | 685  | 4     | 40  | 0      | 92  | 0     | 25  | 0   | 87.9% (29/33)                    |
| 35      |           | 6     | Pd        | 50                   | 1463 | 163  | 3     | 21  | 0      | 33  | 0     | 26  | 0   | 35.5% (11/31)                    |
| 37      |           | 6     | Pd        | 50                   | 877  | 379  | 0     | 86  | 0      | 124 | 3     | 251 | 0   | 100% (33/33)                     |
| 38      |           | 6     | Pd        | 103                  | 1481 | 1525 | 1     | 27  | 176    | 218 | 235   | 38  | 0   | 97% (32/33)                      |
| 41      |           | 6     | Pd        | 40                   | 1692 | 359  | 3     | 118 | 46     | 87  | 0     | 54  | 0   | 97% (32/33)                      |
| 46      |           | 7     | Control   | 35                   | 806  | 683  | 1     | 106 | 0      | 82  | 0     | 31  | 0   | 81% (26/32)                      |
| 47      |           | 7     | Control   | 105                  | 1808 | 973  | 0     | 221 | 0      | 245 | 0     | 231 | 0   | 18.2% (6/33)                     |
| 48      |           | 7     | Control   | 68                   | 1567 | 191  | 0     | 34  | 0      | 34  | 0     | 16  | 0   | 90.9% (30/33)                    |
| 49      |           | 7     | Control   | 120                  | 2661 | 598  | 1     | 182 | 1      | 119 | 0     | 1   | 1   | 42.4% (14/33)                    |
| 52      |           | 7     | Control   | 10                   | 986  | 446  | 0     | 72  | 0      | 31  | 0     | 53  | 0   | 54.5% (18/33)                    |
| 53      |           | 7     | Control   | 34                   | 832  | 1149 | 10    | 0   | 1      | 75  | 0     | 18  | 0   | 33.3% (11/33)                    |
| 20      |           | 8     | 1/2AbPzPd | 66                   | 1709 | 0    | 124   | 0   | 4      | 0   | 7     | 0   | 10  | 0% (0/33)                        |
| 22      |           | 8     | 1/2AbPzPd | 36                   | 882  | 0    | 92    | 0   | 3      | 0   | 41    | 1   | 9   | 0% (0/34)                        |
| 24      |           | 8     | 1/2AbPzPd | 47                   | 1947 | 0    | 104   | 0   | 47     | 0   | 67    | 0   | 0   | 0% (0/30)                        |
| 25      |           | 8     | 1/2AbPzPd | 66                   | 1843 | 0    | 0     | 0   | 0      | 0   | 0     | 0   | 0   | (£)                              |
| 28      |           | 8     | 1/2AbPzPd | 89                   | 2206 | 0    | 1     | 0   | 0      | 0   | 0     | 0   | 32  | 0% (0/7)                         |
| 31      |           | 8     | 1/2AbPzPd | 41                   | 930  | 0    | 599   | 0   | 8      | 0   | 73    | 10  | 3   | 0% (0/34)                        |
| 21      |           | 9     | AbPz2Pd   | 64                   | 2029 | 0    | 1769  | 0   | 85     | 0   | 196   | 0   | 52  | 0% (0/35)                        |
| 23      |           | 9     | AbPz2Pd   | 66                   | 1882 | 0    | 608   | 0   | 12     | 0   | 81    | 0   | 15  | 0% (0/34)                        |
| 26      |           | 9     | AbPz2Pd   | 35                   | 1384 | 0    | 1905  | 0   | 365    | 0   | 140   | 2   | 15  | 0% (0/34)                        |
| 27      |           | 9     | AbPz2Pd   | 36                   | 1162 | 0    | 87    | 0   | 10     | 0   | 4     | 1   | 11  | 0% (0/31)                        |
| 29      |           | 9     | AbPz2Pd   | 65                   | 1390 | 0    | 270   | 0   | 25     | 0   | 19    | 0   | 7   | 0% (0/33)                        |
| 30      |           | 9     | AbPz2Pd   | 40                   | 1414 | 0    | 64    | 0   | 3      | 0   | 17    | 0   | 0   | 0% (0/33)                        |

\*+ = Death before ending the trial; V = viable; NV = non-viable; \* = fixation was delayed, however all cysts looks like scared lesions; W-Msc = weight in grams of examined muscle; ¥ = not performed; £ = no cyst was found; Pig-W = pig weight in kilograms at necropsy.
